# Supplementary material
Source: ML conference proceedings conference paper supplement (https://www.ecva.net/papers/eccv_2020/papers_ECCV/html/123660647_ECCV_2020_paper.php)
Supplement: Supplementary file 1 [file 123660647-supp.pdf]

# Attention-Driven Dynamic Graph Convolutional Network for Multi-Label Image Recognition

Jin Ye<sup>1\*</sup>, Junjun He<sup>1,2\*</sup>, Xiaojiang Peng<sup>1\*</sup>, Wenhao Wu<sup>1</sup>, and Yu Qiao<sup>1†</sup>

<sup>1</sup> ShenZhen Key Lab of Computer Vision and Pattern Recognition, Shenzhen Institutes of Advanced Technology, Chinese Academy of Sciences, Shenzhen, China.  
<sup>2</sup> School of Biomedical Engineering, the Institute of Medical Robotics, Shanghai Jiao Tong University, Shanghai, China.

In supplementary material, we visualize more examples to illustrate whether SAM can locate semantic targets and what relations dynamic graph has learned for a single image.

For each example, (a) is the input image. (b) is the dynamic matrix  $\mathbf{A}_d$  of (a). Specifically, the value of  $\mathbf{A}_d^{c1;c2}$  donates the relation of  $c1$  and  $c2$  when  $c1$  appears. And we can find  $\mathbf{A}_d^{c1;c2}$  is not equal to  $\mathbf{A}_d^{c2;c1}$  easily. (c) is category-specific activation maps of (a). The caption of activation map (e.g. Car: 1.00) means that the final classification score of the category “car” is “1.00” .

ADD-GCN learns a dynamic graph for each images. And we can observe that the labels of each image have strong relation values in the dynamic graph even though they have lower co-occurrence possibilities in the real world. For example, the probability that “dog” and “bottle” come together is very low in the real world or in a common image. But we can find that the relevant scores of “dog” and “bottle” ( $\mathbf{A}_d^{dog;bottle}$  and  $\mathbf{A}_d^{bottle;dog}$ ) rank top in each row ( $\mathbf{A}_d^{dog}$  and  $\mathbf{A}_d^{bottle}$ ) from Fig 1(b). The scores indicate that they have strong relation in Fig 1(a). Similar results can be found in other examples.

Table 1: The dictionary of dynamic matrix on MS-COCO. Each cell is a map of index to category of dynamic matrix on MS-COCO.

|              |                 |                  |              |                |                  |               |                  |                  |             |
|--------------|-----------------|------------------|--------------|----------------|------------------|---------------|------------------|------------------|-------------|
| 0 airplane   | 1 apple         | 2 backpack       | 3 banana     | 4 baseball bat | 5 baseball glove | 6 bear        | 7 bed            | 8 bench          | 9 bicycle   |
| 10 bird      | 11 boat         | 12 book          | 13 bottle    | 14 bowl        | 15 broccoli      | 16 bus        | 17 cake          | 18 car           | 19 carrot   |
| 20 cat       | 21 cell phone   | 22 chair         | 23 clock     | 24 couch       | 25 cow           | 26 cup        | 27 dining table  | 28 dog           | 29 donut    |
| 30 elephant  | 31 fire hydrant | 32 fork          | 33 frisbee   | 34 giraffe     | 35 hair drier    | 36 handbag    | 37 horse         | 38 hot dog       | 39 keyboard |
| 40 kite      | 41 knife        | 42 laptop        | 43 microwave | 44 motorcycle  | 45 mouse         | 46 orange     | 47 oven          | 48 parking meter | 49 person   |
| 50 pizza     | 51 potted plant | 52 refrigerator  | 53 remote    | 54 sandwich    | 55 scissors      | 56 sheep      | 57 sink          | 58 skateboard    | 59 skis     |
| 60 snowboard | 61 spoon        | 62 sports ball   | 63 stop sign | 64 suitcase    | 65 surfboard     | 66 teddy bear | 67 tennis racket | 68 tie           | 69 toaster  |
| 70 toilet    | 71 toothbrush   | 72 traffic light | 73 train     | 74 truck       | 75 tv            | 76 umbrella   | 77 vase          | 78 wine glass    | 79 zebra    |

\* Equally-contributed first authors. †Corresponding author (yu.qiao@siat.ac.cn)

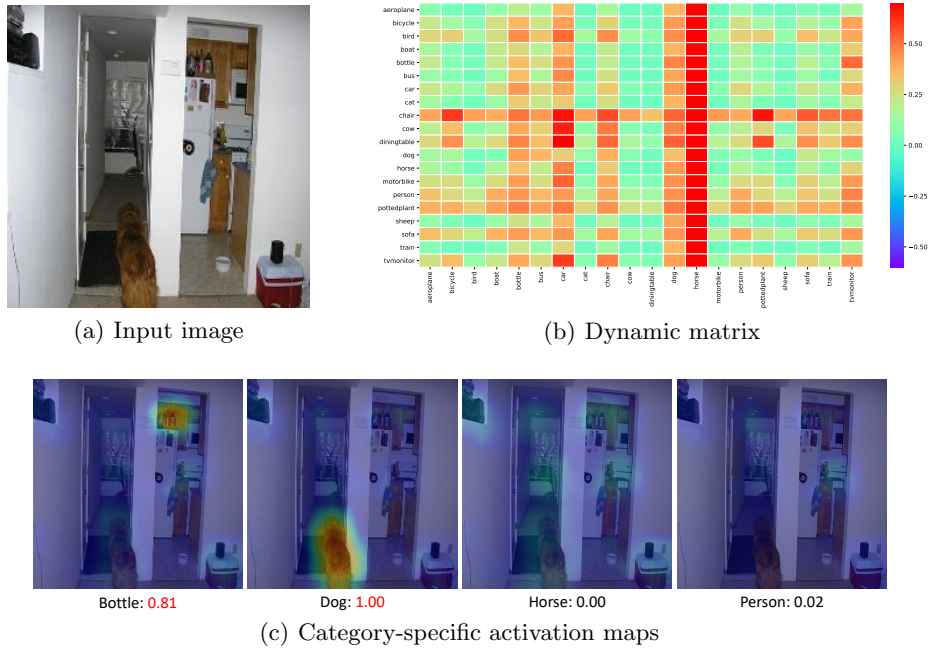

Fig. 1: Example on VOC2007. Labels are “bottle” and “dog”.

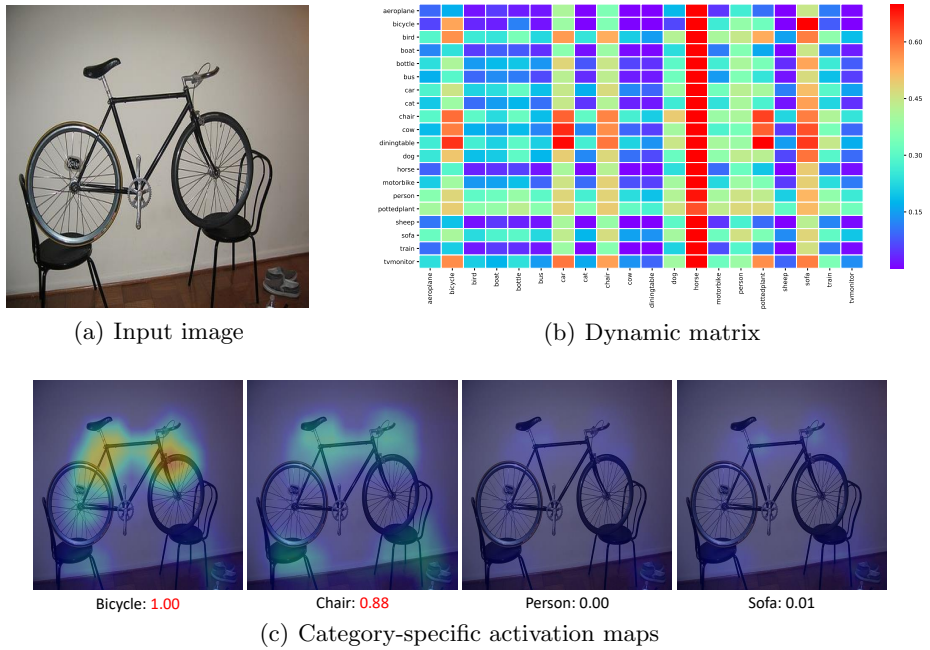

Fig. 2: Example on VOC2007. Labels are “bicycle” and “chair”.

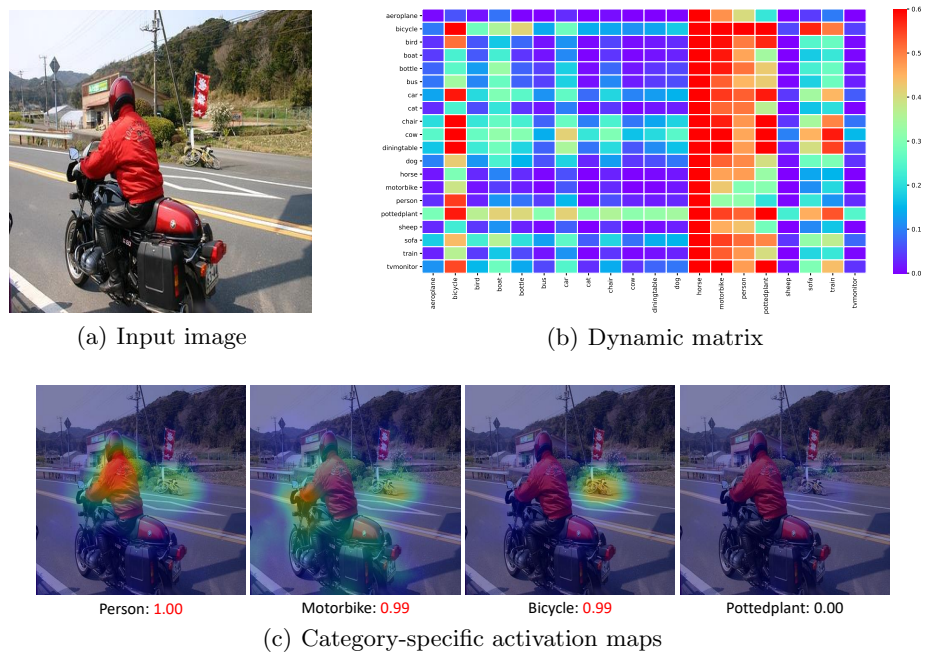

Fig. 3: Example on VOC2007. Labels are “person”, “motorbike” and “bicycle”.

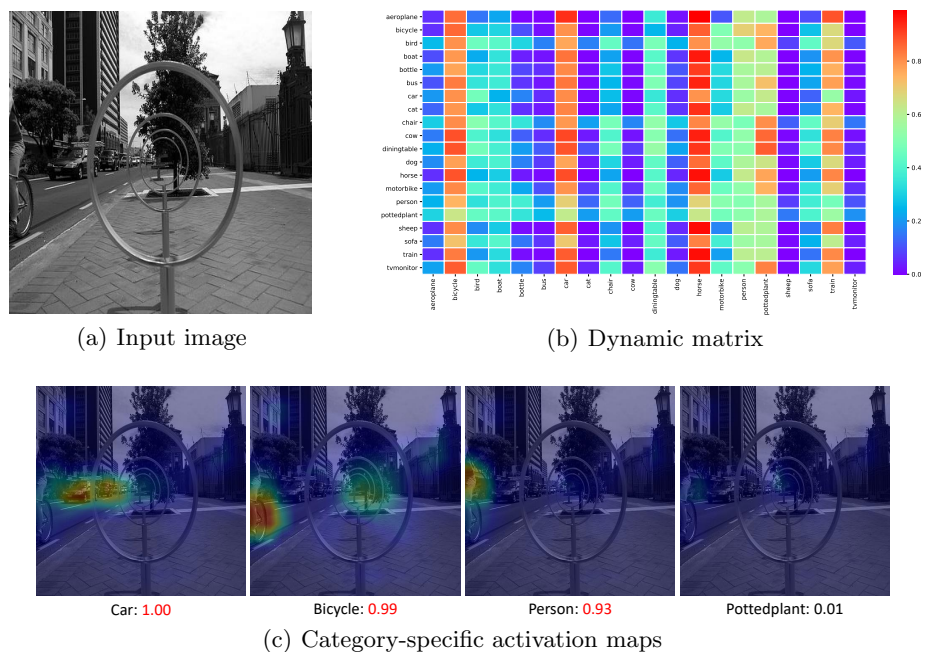

Fig. 4: Example on VOC2007. Labels are “car”, “bicycle” and “person”.

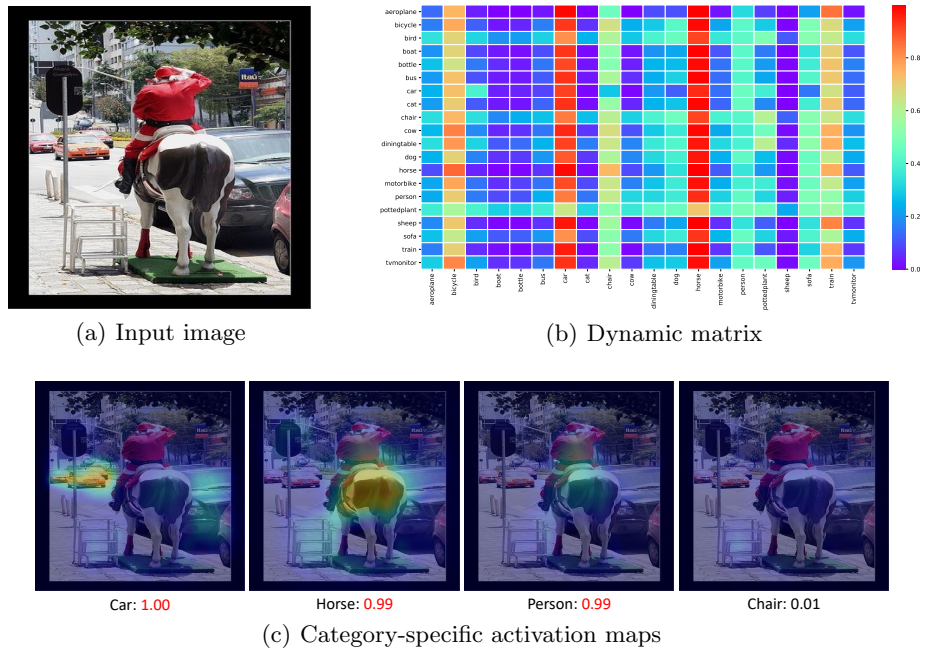

Fig. 5: Example on VOC2007. Labels are “car”, “horse” and “person”.

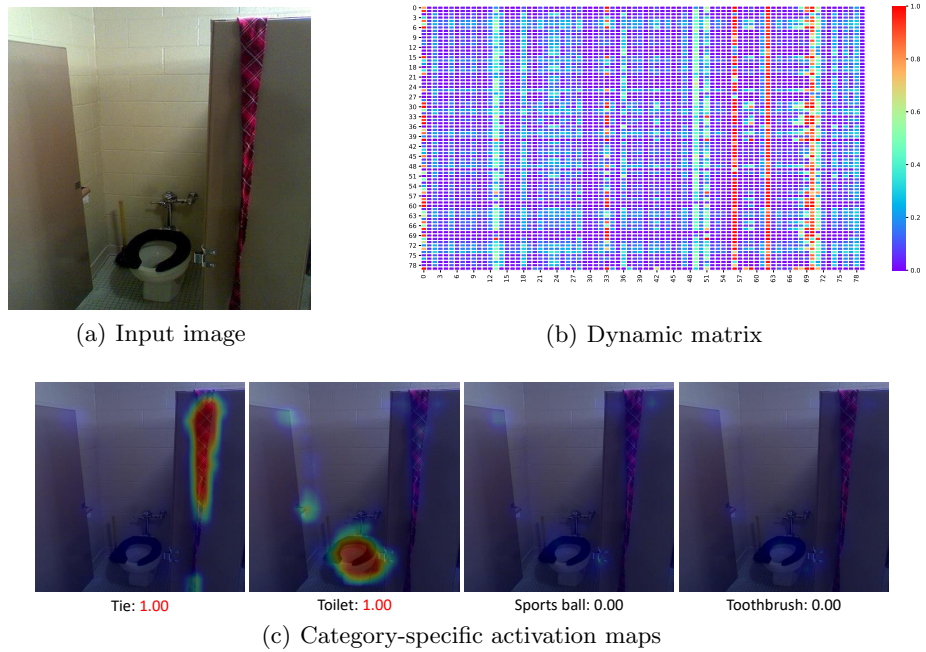

Fig. 6: Example on MS-COCO. Labels are “tie” and “toilet”.

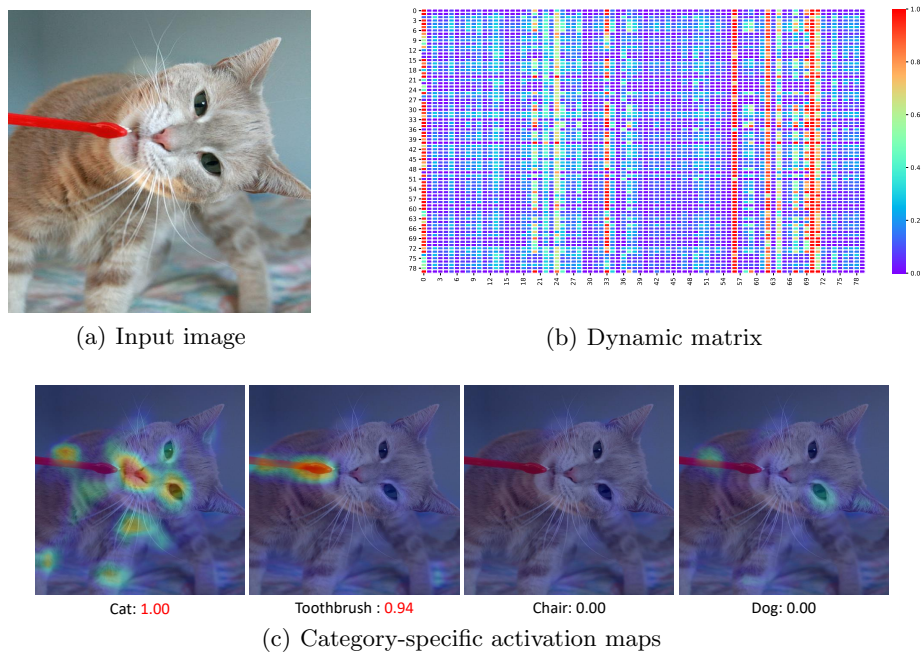

Fig. 7: Example on MS-COCO. Labels are “cat” and “toothbrush”.

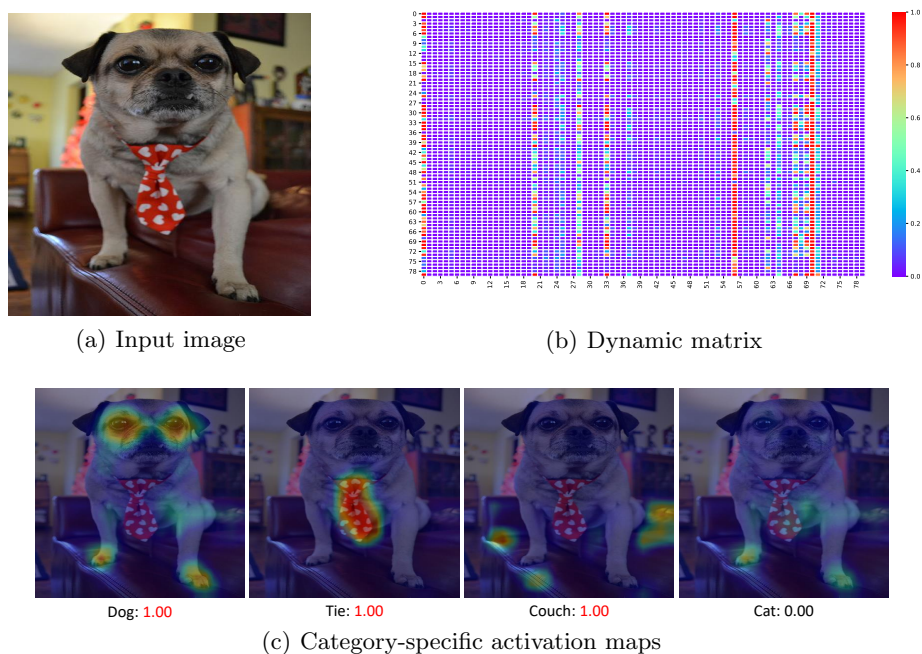

Fig. 8: Example on MS-COCO. Labels are “dog”, “tie” and “couch”.
